# Supplementary material for: Sub-ppb H₂S Sensing with Screen Printed Porous ZnO/SnO₂ Heterostructures
Source: Preprints.org preprint supplement (doi:10.20944/preprints202410.0436.v1), 2024-10-08
Supplement: Supplementary file 1 [file supplementary]

**Supplementary**

Sub-ppb H₂S Sensing with Screen Printed Porous ZnO/SnO₂ Heterostructures

Mehdi Akbari-Saatlu *, Masoumeh Heidari, Claes Mattsson, Renyun Zhang and Göran Thungström

Department of Engineering, Mathematics and Science Education, Mid Sweden University, Holmgatan 10, SE-85170 Sundsvall, Sweden.

***** Correspondence: author: mehdi.akbarisaatlu@miun.se


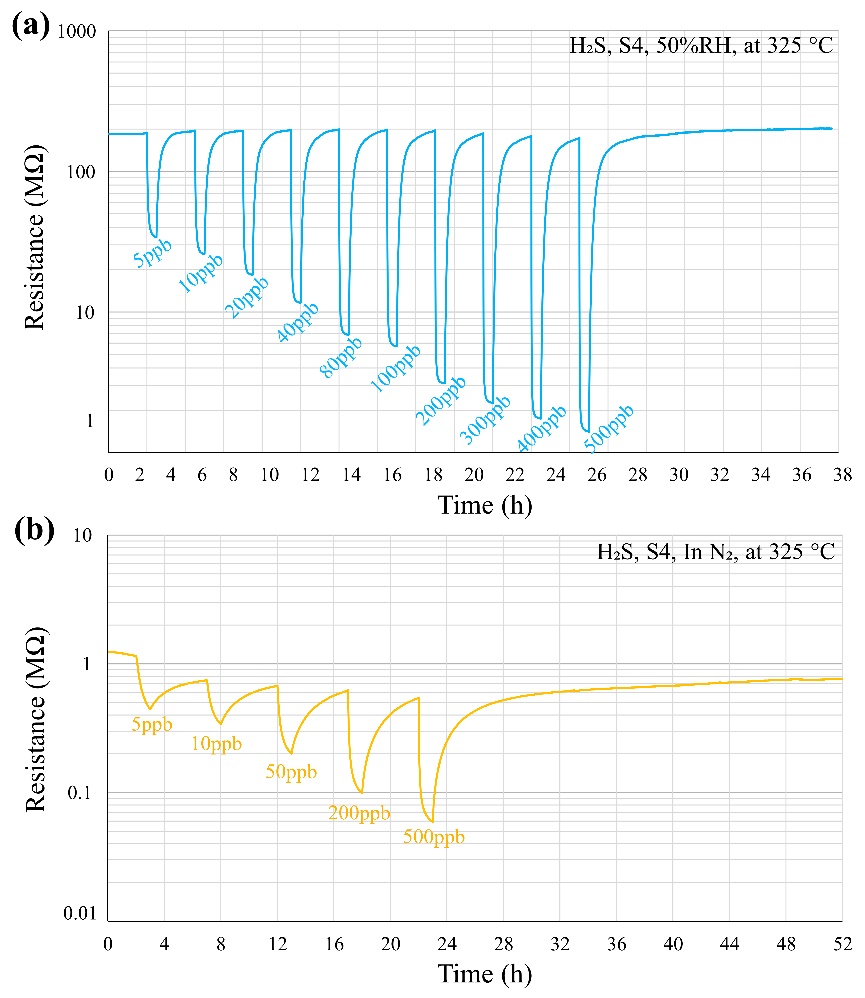


**Figure S1.** Dynamic response (Rg) of the sensor S4 to different concentrations of H2S under 50%RH and in N2 conditions.
